# Supplementary material for: The Impact of Cytomegalovirus Infection on Natural Killer and CD8+ T Cell Phenotype in Multiple Sclerosis
Source: MDPI journal article supplement (doi:10.3390/biology13030154), 2024-02-28
Supplement: s1 [file s1]

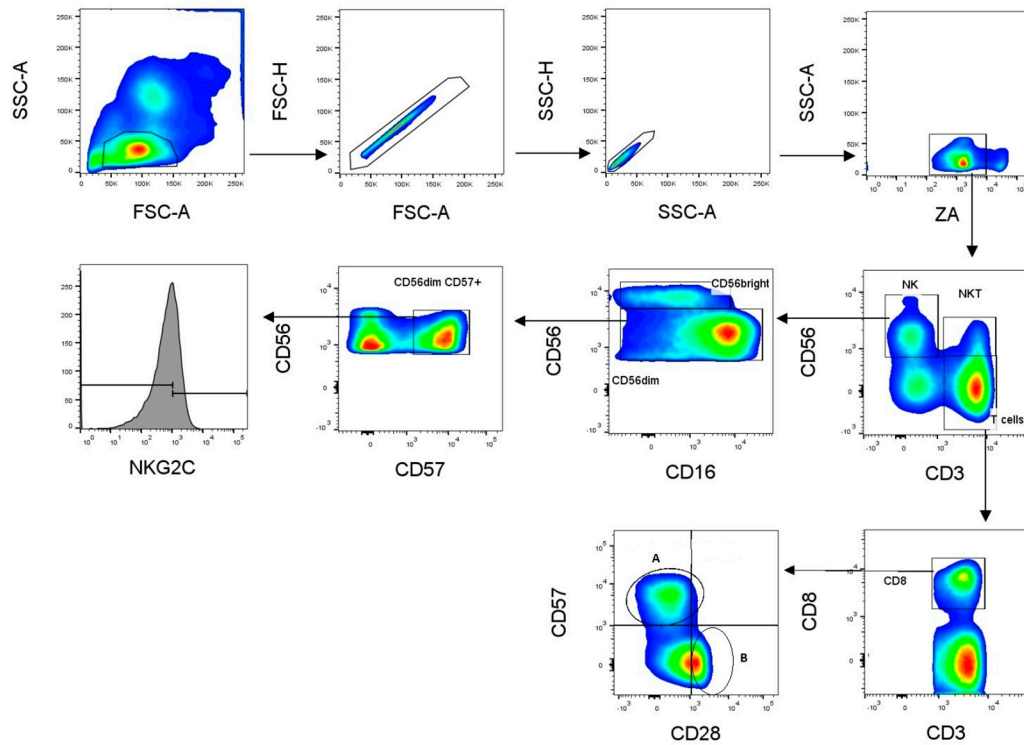

**Supplementary Figure S1. Gating strategy.** PBMC were gated based on forward (FSC) and side scatter (SSC), and then gated for singlets. After the exclusion of dead cells with Zombie Aqua dye, NK, T and NKT-like cells were identified based on CD3 and CD56 expression. NK cells were identified as CD3<sup>-</sup> CD56<sup>+</sup>. Based on CD16 and CD56 expression, CD56dim and CD56bright NK cells were identified. CD57<sup>+</sup> NK cells were identified in CD56dim gate. The NKG2C median fluorescence intensity (MFI) was evaluated on CD57<sup>+</sup> NK cells subset. NKT-like cells were identified as CD3<sup>+</sup> CD56<sup>+</sup>. T cells were identified as CD3<sup>+</sup> CD56<sup>-</sup>. In T-cell gate, we identified CD8<sup>+</sup> based on CD3 and CD8 expression. In CD8 gate, we further identified (A) late-differentiated CD8 T cells and (B) early-differentiated CD8 T cells based on CD28/CD57 expression.
